# Supplementary material
Source: publisher site journal article supplement (https://www.dovepress.com/get_supplementary_file.php?f=supplementary_file_68909_2.pdf)
Supplement: Supplementary file 1 [file get_supplementary_file.php]

Table S2: The experimentally measured human jejunal permeability of 29 drugs vs. the in-silico calculations of LogP with the different methods

| Drug                | Value                                       |                     |                     |                      |                     |                            | Classification of drug permeability with partition coefficients vs. human jejunal permeability |                      |                     |                            |
|---------------------|---------------------------------------------|---------------------|---------------------|----------------------|---------------------|----------------------------|------------------------------------------------------------------------------------------------|----------------------|---------------------|----------------------------|
|                     | Human permeability (x 10 <sup>4</sup> cm/s) | MLogP (BioLoom 5.0) | CLogP (BioLoom 5.0) | CLogP (ChemDraw 8.0) | ALogP (MOE 2004.03) | KLog P (Molecular Formula) | CLogP (BioLoom 5.0)                                                                            | CLogP (ChemDraw 8.0) | ALogP (MOE 2004.03) | KLog P (Molecular Formula) |
| α-methyldopa        | 0.1                                         | -                   | -2.26               | -2.26                | 0.44                | 0.26                       | C                                                                                              | C                    | C                   | C                          |
| amoxicillin         | 0.3                                         | -1.99               | -1.87               | -1.87                | 0.02                | 0.67                       | C                                                                                              | C                    | C                   | C                          |
| antipyrine          | 5.6                                         | 0.23                | 0.2                 | 0.2                  | 1.78                | 1.55                       | Fn                                                                                             | Fn                   | C                   | Fn                         |
| atenolol            | 0.2                                         | 0.16                | -0.11               | -0.11                | 0.45                | 1.33                       | C                                                                                              | C                    | C                   | C                          |
| carbamazepine       | 4.3                                         | 3.19                | 2.38                | 2.38                 | 3.39                | 2.54                       | C                                                                                              | C                    | C                   | C                          |
| cephalexin          | 1.56                                        | -1.74               | -1.84               | -1.84                | 0.44                | 1.13                       | Fn                                                                                             | Fn                   | Fn                  | Fn                         |
| cimetidine          | 0.26                                        | 0.4                 | 0.38                | 0.35                 | 0.6                 | 0.51                       | C                                                                                              | C                    | C                   | C                          |
| creatinine          | 0.29                                        | -1.76               | -1.76               | -1.77                | -1.01               | -0.46                      | C                                                                                              | C                    | C                   | C                          |
| desipramine         | 4.5                                         | 4.54                | 4.47                | 4.47                 | 3.53                | 3.67                       | C                                                                                              | C                    | C                   | C                          |
| enalapril           | 1.57                                        | -                   | 0.67                | 0.67                 | 1.6                 | 1.87                       | Fn                                                                                             | Fn                   | C                   | C                          |
| enalaprilat         | 0.2                                         | -                   | 0.75                | 0.88                 | 1.13                | 1.4                        | C                                                                                              | C                    | C                   | C                          |
| fluvastatin         | 2.4                                         | 3.8                 | 4.05                | 4.05                 | 4.63                | 3.53                       | C                                                                                              | C                    | C                   | C                          |
| furosemide          | 0.05                                        | 2.03                | 1.9                 | 1.9                  | 1.89                | 0.7                        | Fp                                                                                             | Fp                   | Fp                  | C                          |
| hydrochlorothiazide | 0.04                                        | -0.07               | -0.36               | -0.37                | -0.35               | -0.34                      | C                                                                                              | C                    | C                   | C                          |
| inogatran           | 0.03                                        | -0.1                | -0.14               | -                    | 0.37                | 1.24                       | C                                                                                              | NA                   | C                   | C                          |
| ketoprofen          | 8.7                                         | 3.12                | 2.76                | 2.76                 | 3.11                | 2.5                        | C                                                                                              | C                    | C                   | C                          |
| levodopa            | 3.4                                         | -2.74               | -2.82               | -2.82                | 0.05                | 0.03                       | Fn                                                                                             | Fn                   | Fn                  | Fn                         |
| l-leucine           | 6.2                                         | -1.55               | -1.67               | -1.67                | 0.44                | 0.18                       | Fn                                                                                             | Fn                   | Fn                  | Fn                         |
| lisinopril          | 0.33                                        | -                   | -1.82               | -1.69                | 1.24                | 1.78                       | C                                                                                              | C                    | C                   | C                          |
| losartan            | 1.15                                        | -                   | 3.85                | 4.11                 | 4.27                | 3.59                       | Fp                                                                                             | Fp                   | Fp                  | Fp                         |

|               |      |       |       |       |       |       |     |     |     |     |
|---------------|------|-------|-------|-------|-------|-------|-----|-----|-----|-----|
| metoprolol    | 1.34 | 1.88  | 1.49  | 1.49  | 1.61  | 1.87  | ref | ref | ref | ref |
| naproxen      | 8.5  | 3.34  | 2.82  | 2.82  | 3.04  | 2.01  | C   | C   | C   | C   |
| phenylalanine | 6.65 | -1.52 | -1.56 | -1.56 | 0.64  | 0.93  | Fn  | Fn  | Fn  | Fn  |
| piroxicam     | 6.65 | 1.98  | 1.89  | 1.89  | 1.58  | 0.91  | C   | C   | Fn  | Fn  |
| propranolol   | 2.91 | 2.98  | 2.75  | 2.75  | 2.58  | 2.6   | C   | C   | C   | C   |
| ranitidine    | 0.27 | 0.27  | 0.67  | 0.63  | 1.05  | 0.49  | C   | C   | C   | C   |
| terbutaline   | 0.3  | 0.08  | 0.48  | 0.48  | 1.52  | 1.17  | C   | C   | C   | C   |
| valacyclovir  | 1.66 | -     | -1.22 | -1.22 | -0.93 | -0.62 | Fn  | Fn  | Fn  | Fn  |
| verapamil     | 6.8  | 3.97  | 4.47  | 4.47  | 5.09  | 3.98  | C   | C   | C   | C   |
